# Supplementary material for: From design to efficiency: cobalt-based MOFs for efficient and stable electrocatalysis in hydrogen and oxygen evolution reactions
Source: Royal Society of Chemistry journal article supplement (doi:10.1039/d5ra00286a), 2025-01-01
Supplement: d5ra00286a1.pdf [file d5ra00286a1.pdf]

# **From Design to Efficiency: Cobalt-Based MOFs For Efficient and Stable Electrocatalysis in Hydrogen and Oxygen Evolution Reactions**

Junaid Khan<sup>a, b, \*</sup>, Anique Ahmed<sup>c, d</sup>, Abdullah A. Al-Kahtani<sup>e</sup>

<sup>a</sup>Department of Physics, Government Postgraduate Collage No.1, Abbottabad, Khyber Pakhtunkhwa, Pakistan

<sup>b</sup>Department Of Higher Education Achieves and Libraries, Government of Khyber Pakhtunkhwa, Pakistan

<sup>c</sup>Faculty of Engineering Sciences, GIK Institute of Engineering Sciences and Technology, Topi 23640, Khyber Pakhtunkhwa, Pakistan

<sup>d</sup>Department of Chemical and Bilogical Engineering, Gachon University, 1342 Seongnam-daero, Seongnam13120, Republic of Korea

<sup>e</sup>Chemistry Department, Collage of Science, King Saud University, P. O. Box 2455, Riyadh-22451, Saudi Arabia

\*Email: [junaidkhan.nanotech@gmail.com](mailto:junaidkhan.nanotech@gmail.com)

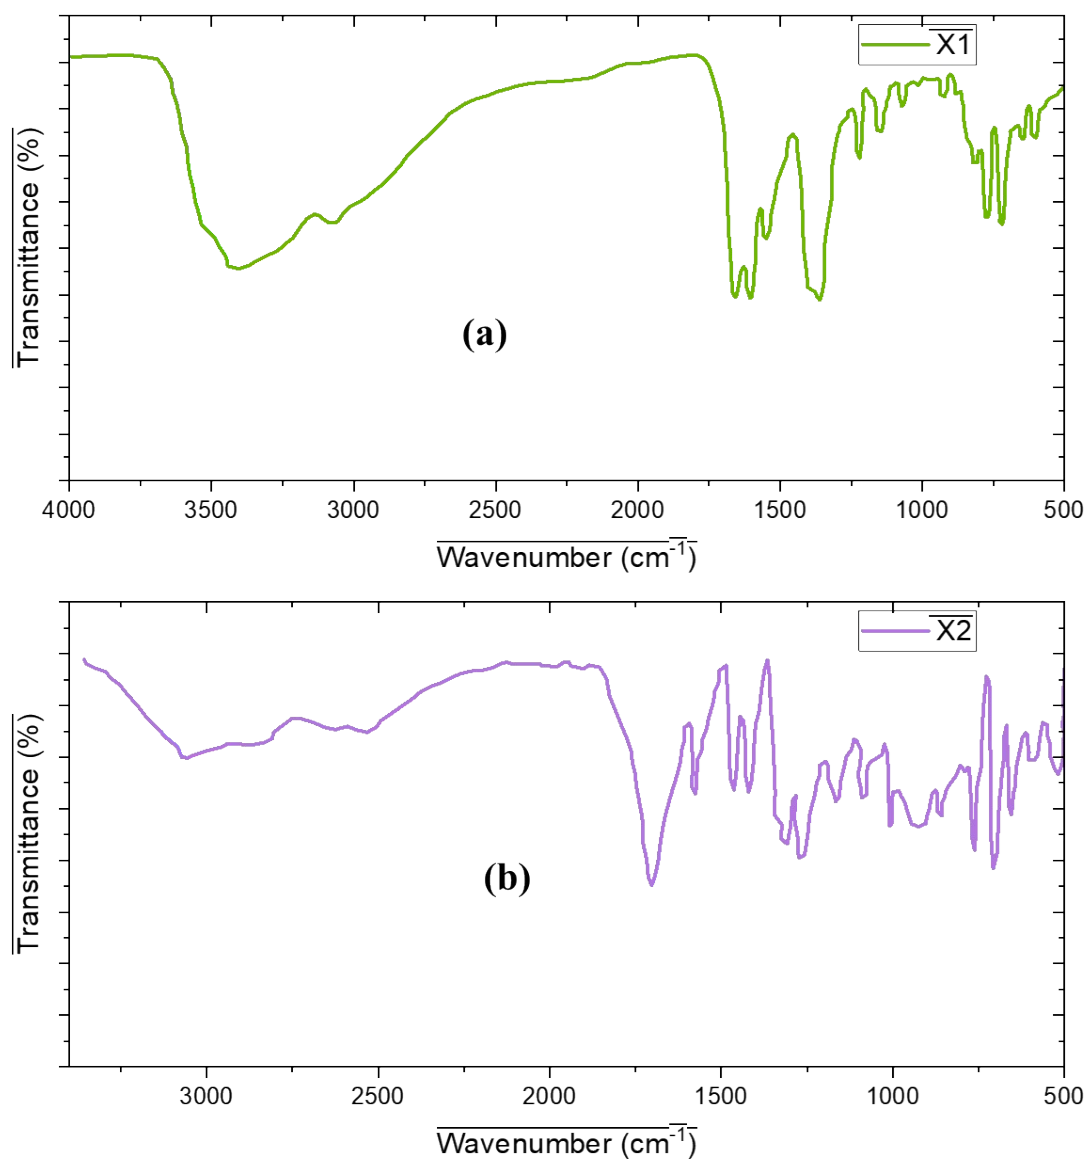

**Figure S1:** FTIR spectrum of X1 and X2.

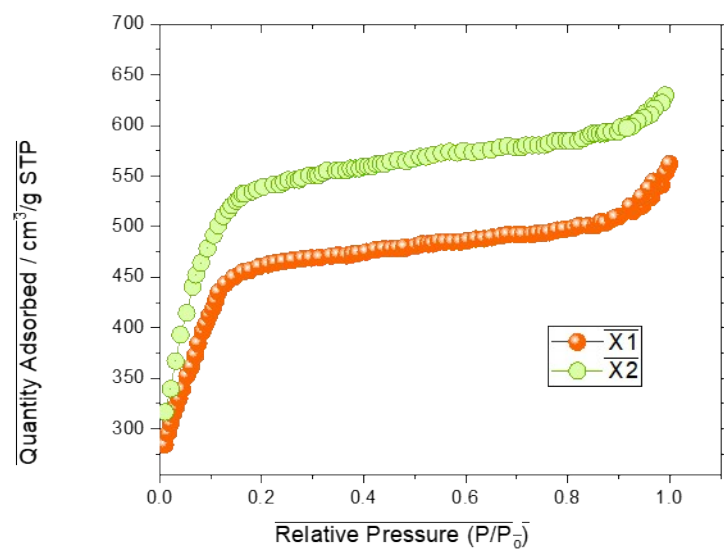

**Figure S2:** BET results of X1 and X2

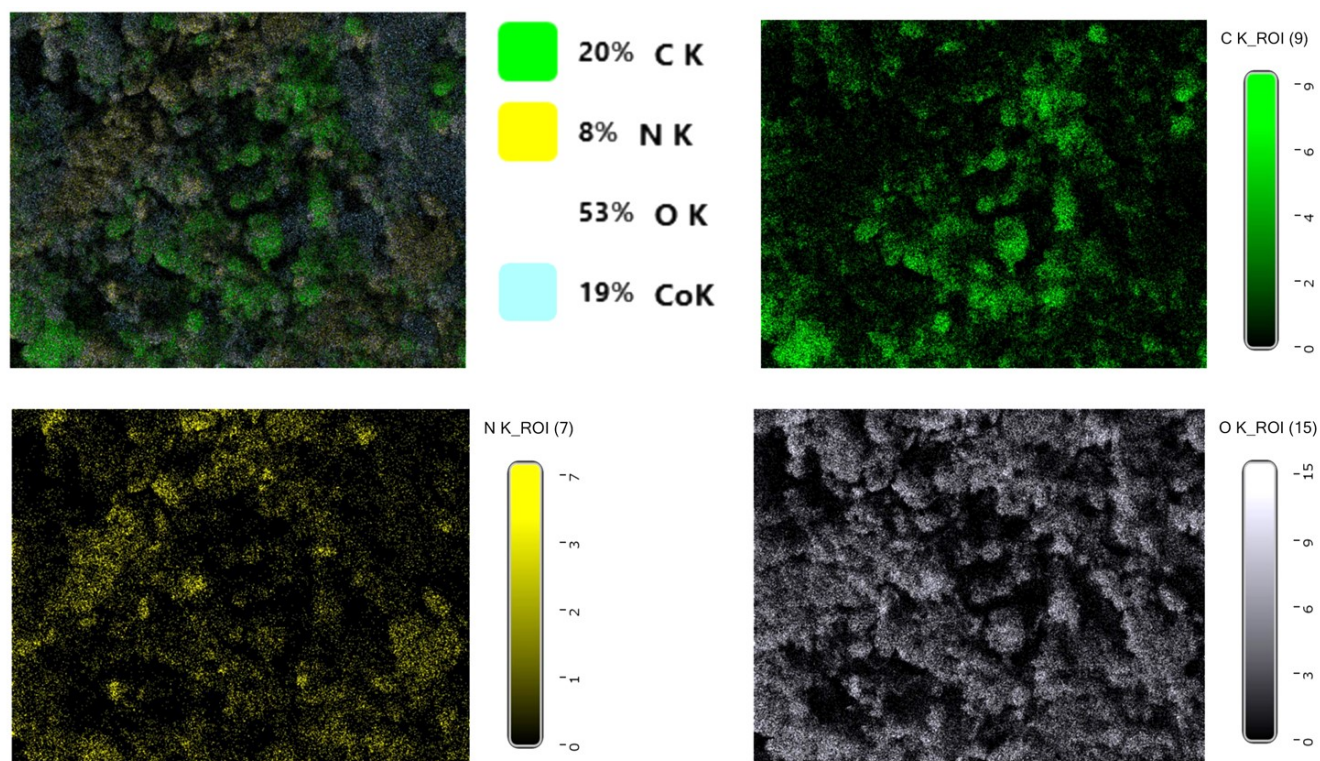

**Figure S3:** Elemental mapping of X1.

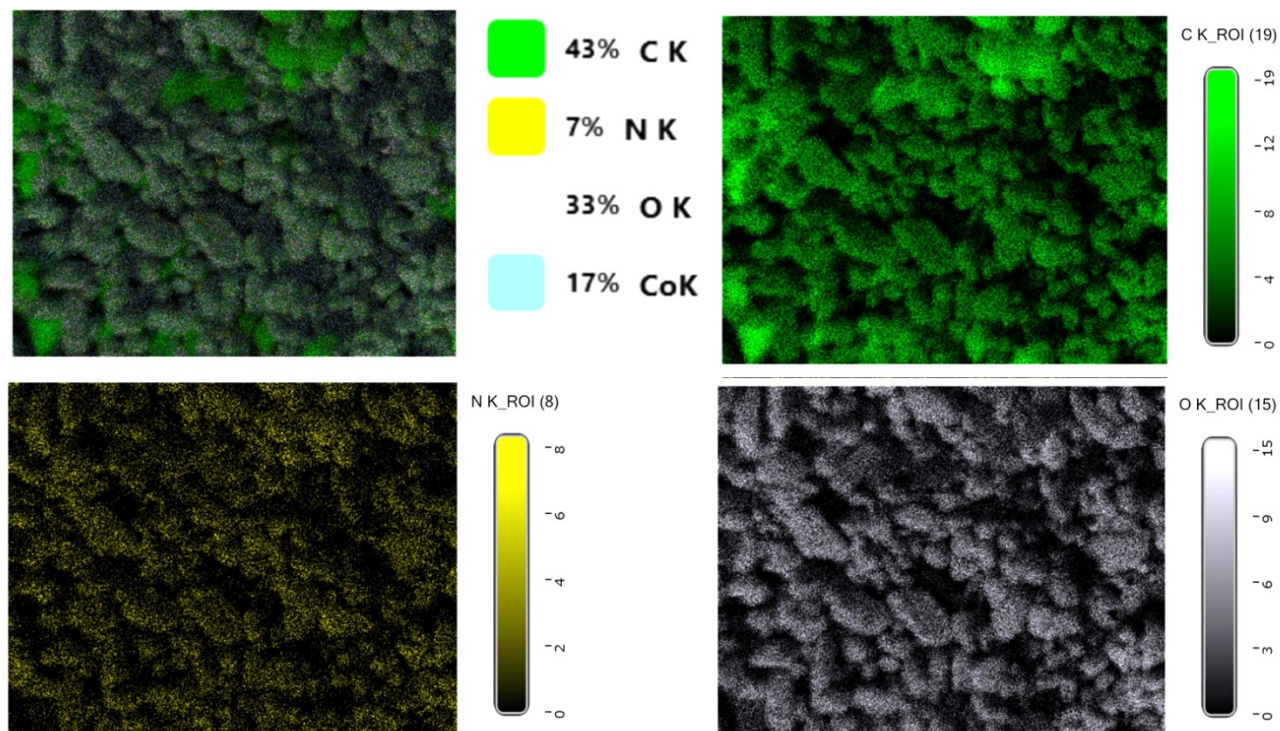

**Figure S4:** Elemental mapping of X2.
